# Supplementary material for: Involvement of the epidermal growth factor receptor in IL‐13–mediated corticosteroid‐resistant airway inflammation
Source: PubMed Central journal article supplement (PMC7317751; doi:10.1111/cea.13591), 2020-03-09
Supplement: CEA-50-672-s003.pdf [file CEA-50-672-s003.pdf]

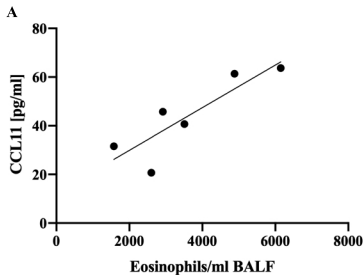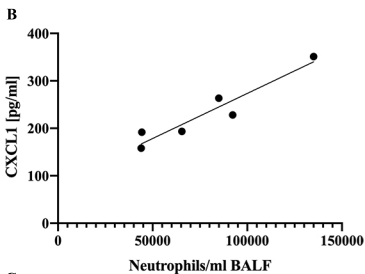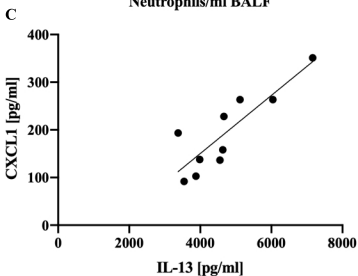

Figure S3
